# Supplementary material
Source: bioRxiv or medRxiv preprint supplement (http://biorxiv.org/highwire/filestream/23118/field_highwire_adjunct_files/0/072561-1.pdf)
Supplement: Supplementary file [file 072561-1.pdf]

## Supplementary information

All manuscript, code and data files can be found at the following github page:

<https://github.com/omaclaren/open-manuscripts/tree/master/hierarchical-framework-intestinal-epithelium>
